# Supplementary material for: Loss of RND3/RHOE controls entosis through LAMP1 expression in hepatocellular carcinoma
Source: PubMed Central journal article supplement (PMC10787830; doi:10.1038/s41419-024-06420-3), 2024-01-13

# Supplemental Figure 1

**A**

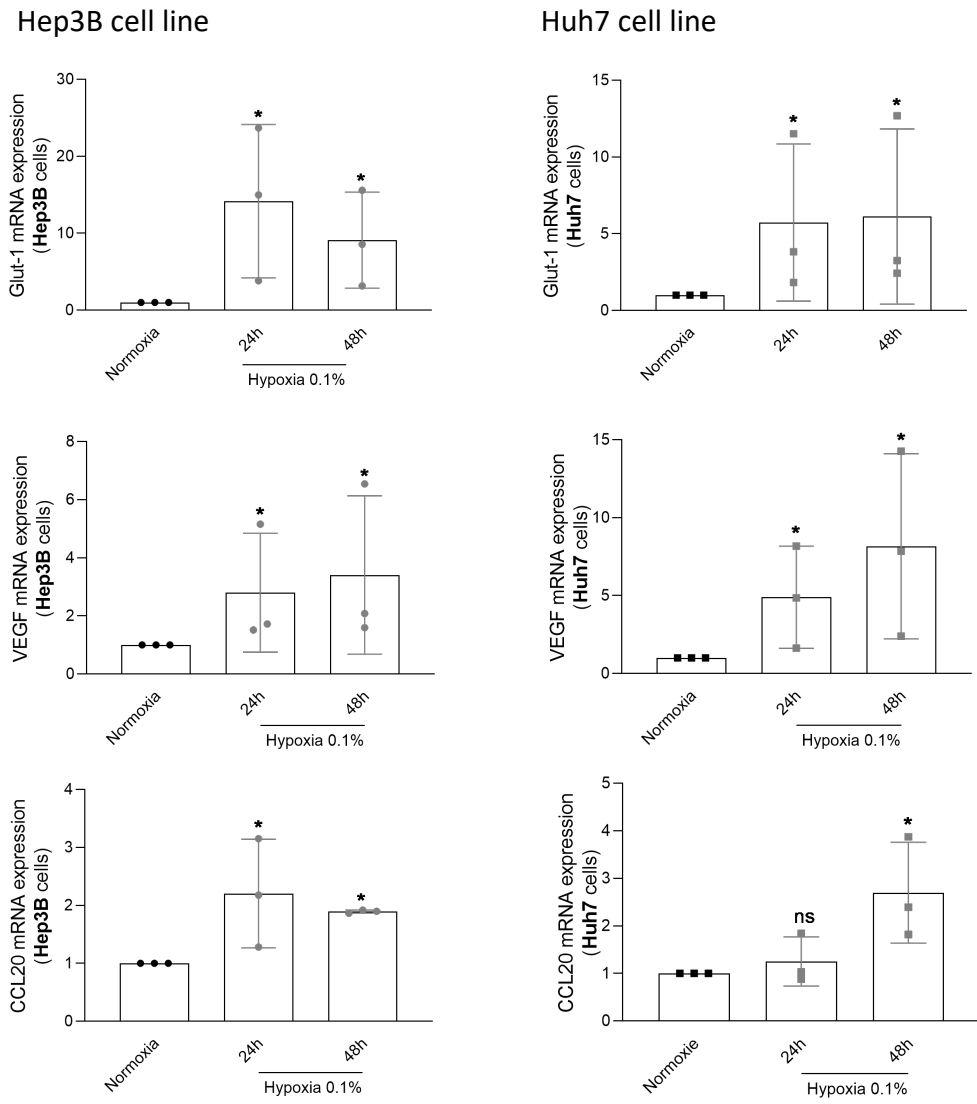

**B**

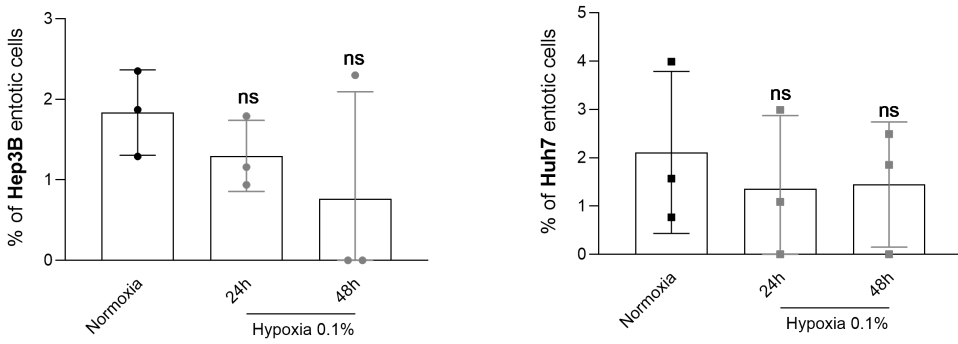

**C**

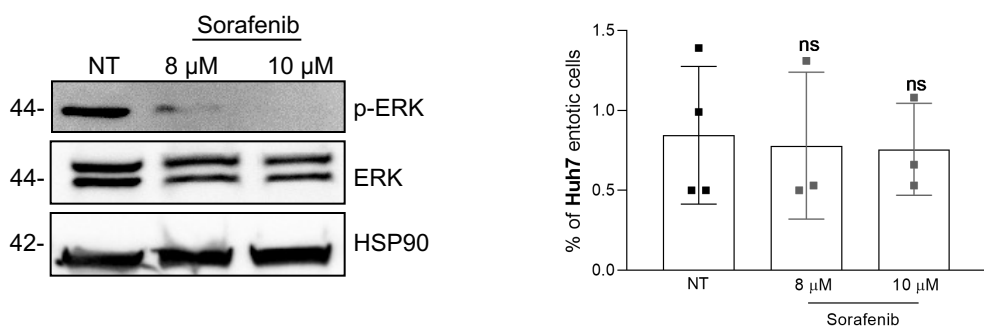

# Supplemental Figure 2

**A**

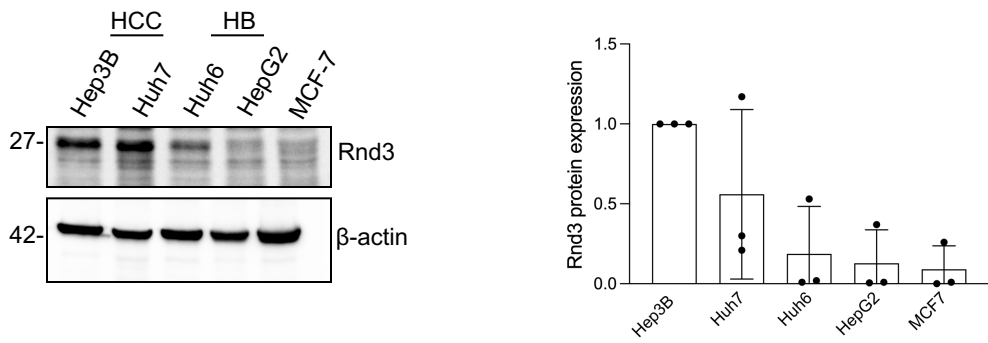

**B**

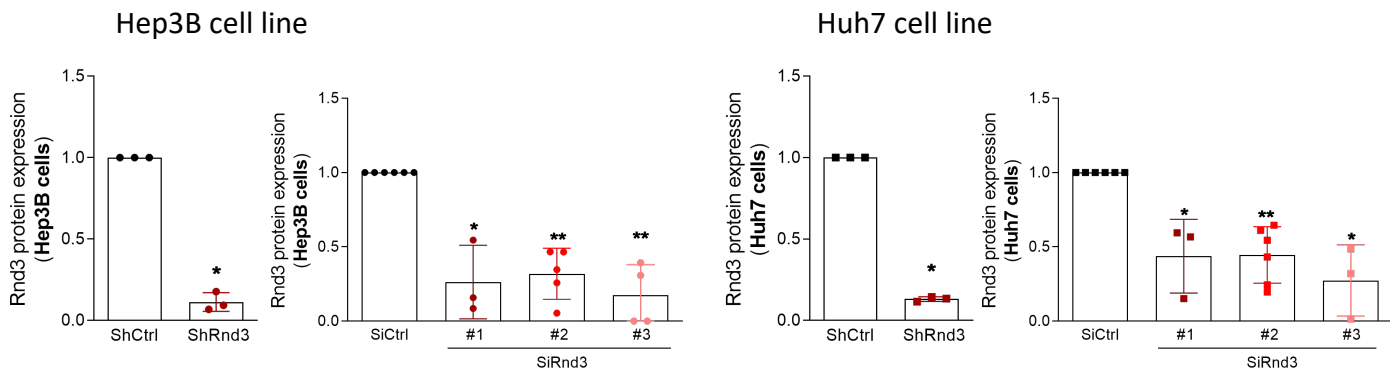

**C**

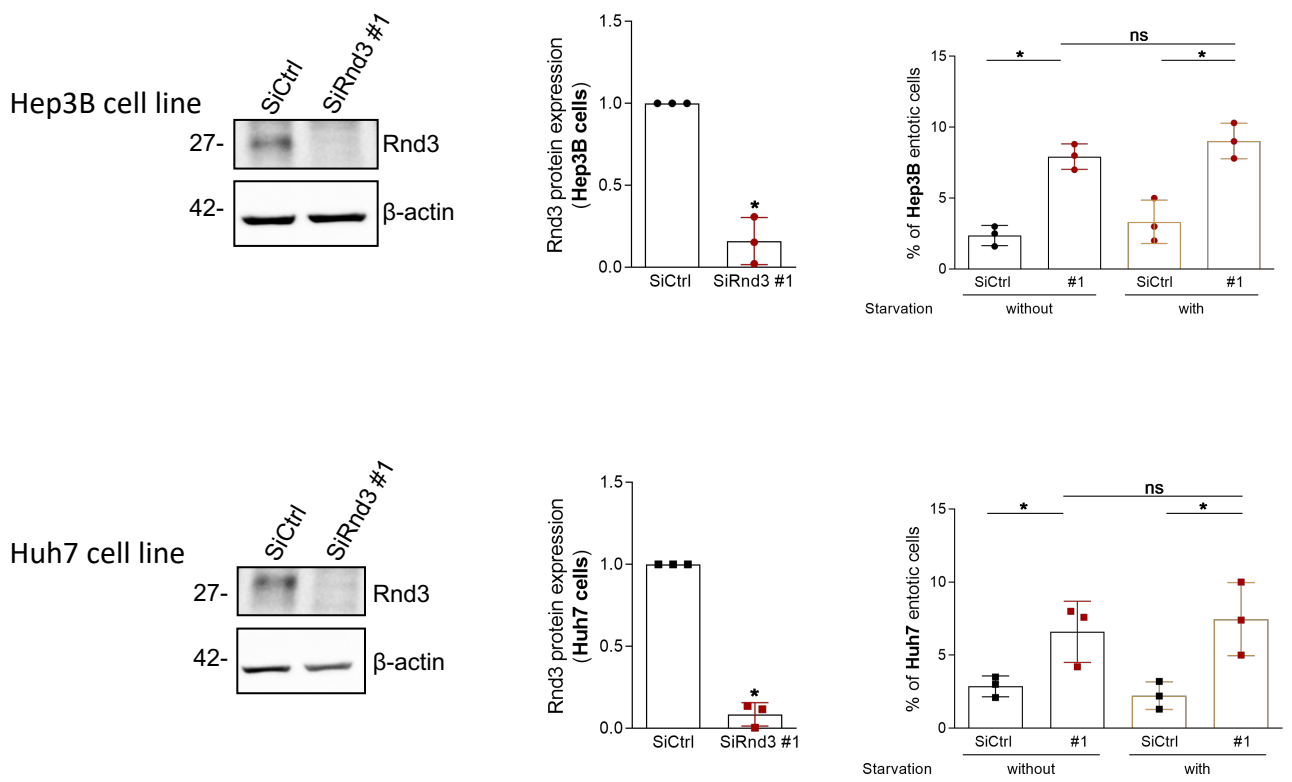

# Supplemental Figure 3

A

Hep3B-H2B-GFP  
Wild-type (WT)

Hep3B-H2B-RFP  
siRnd3-treated

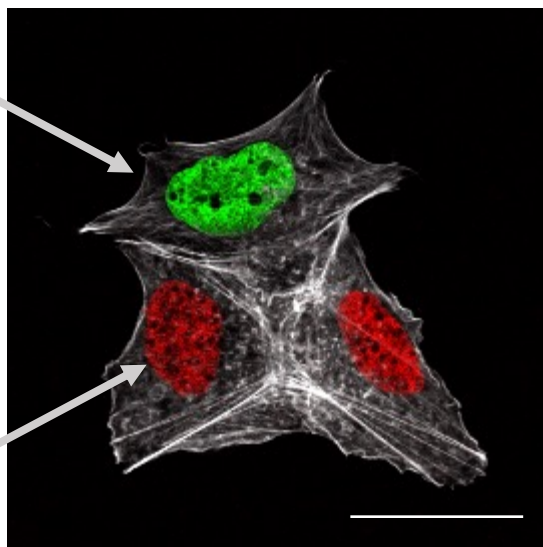

B

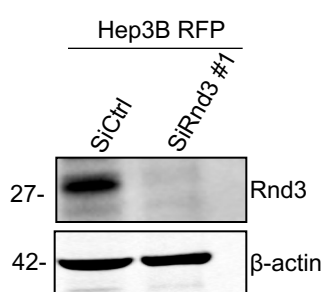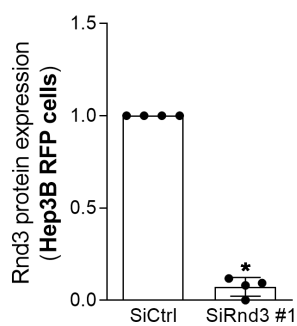

# Supplemental Figure 4

**A**

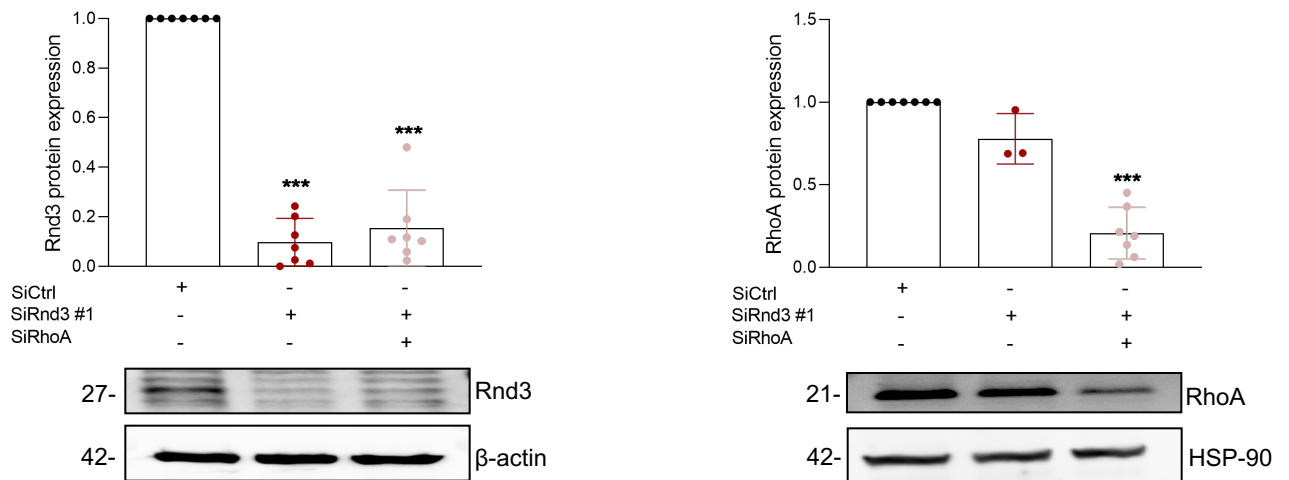

**B**

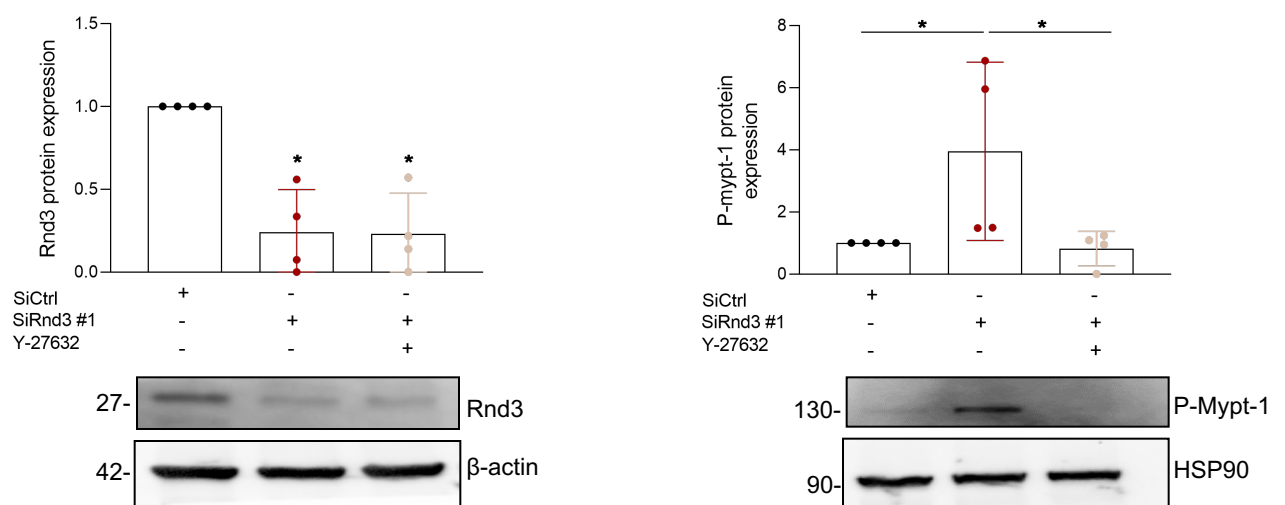

**C**

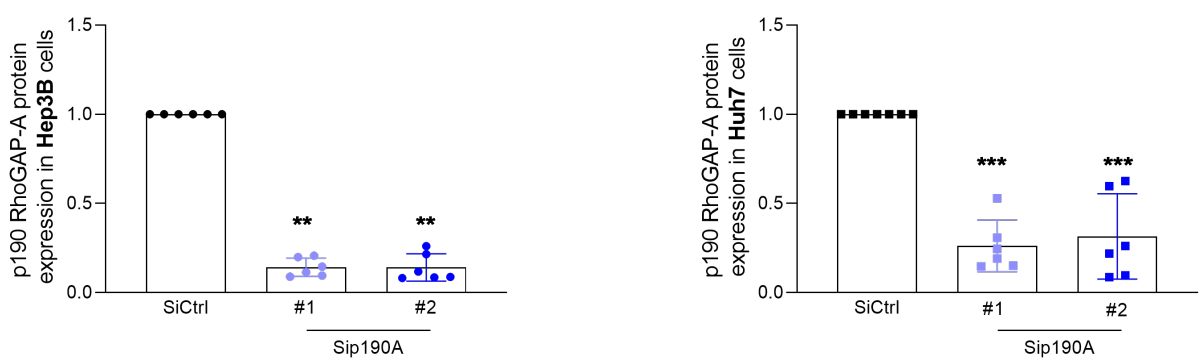



# Supplemental Figure 5

**A**

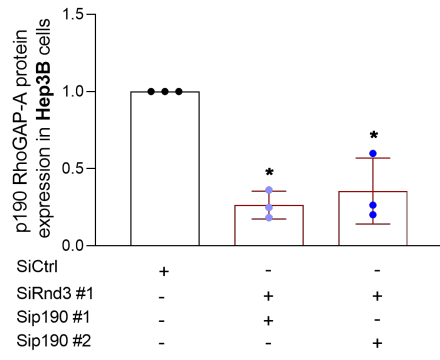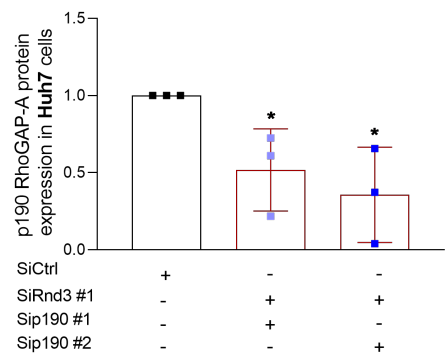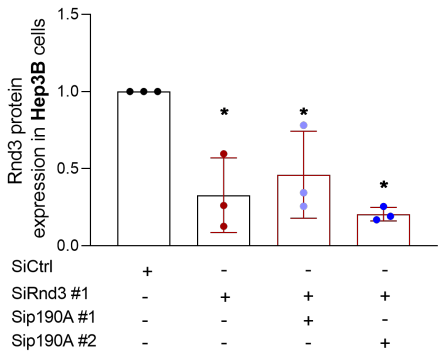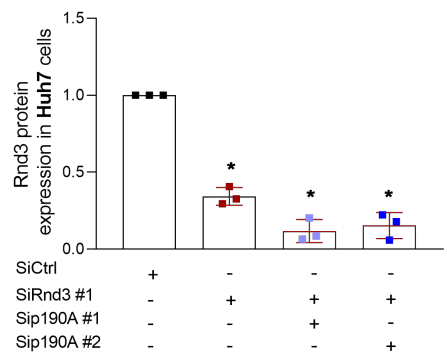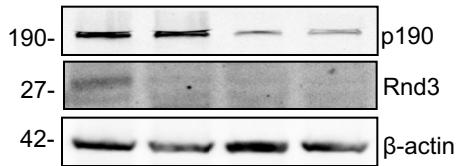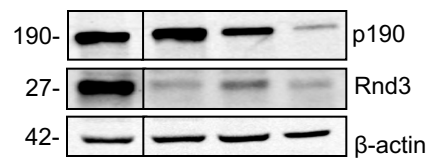

**B**

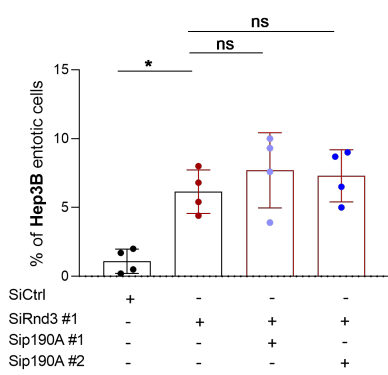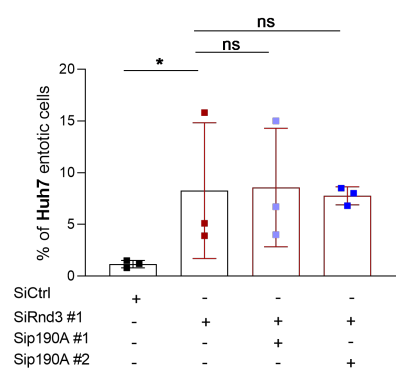

# Supplemental Figure 6

A

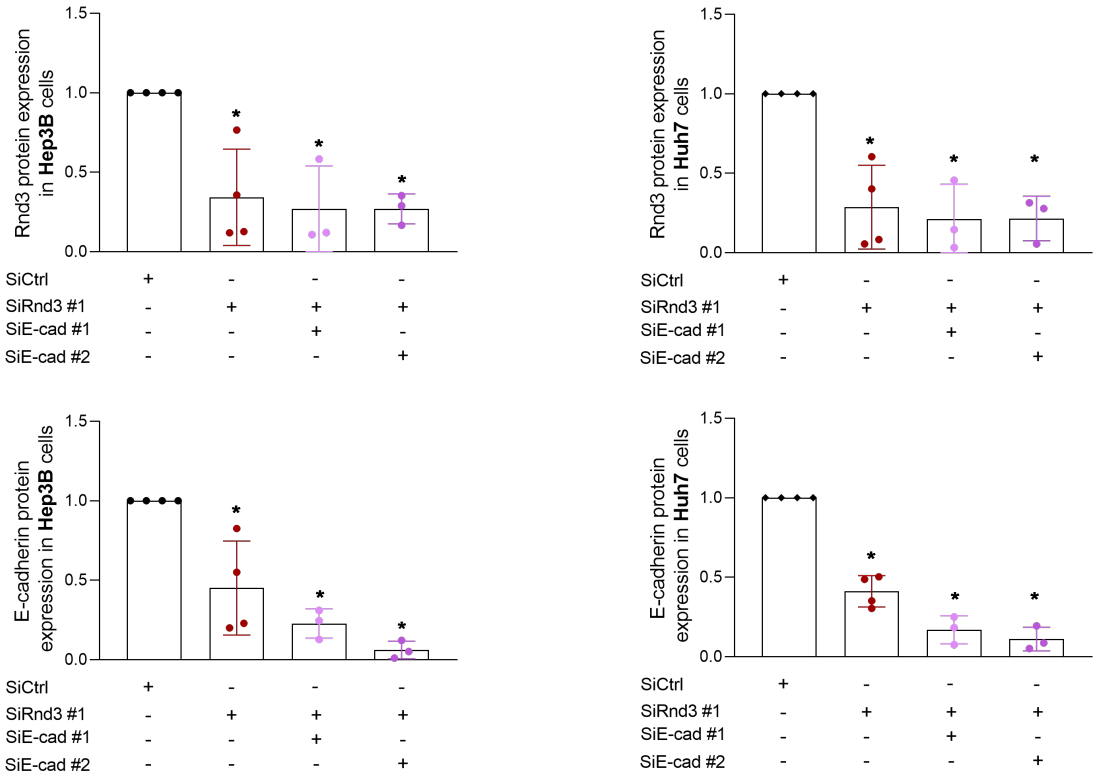

B

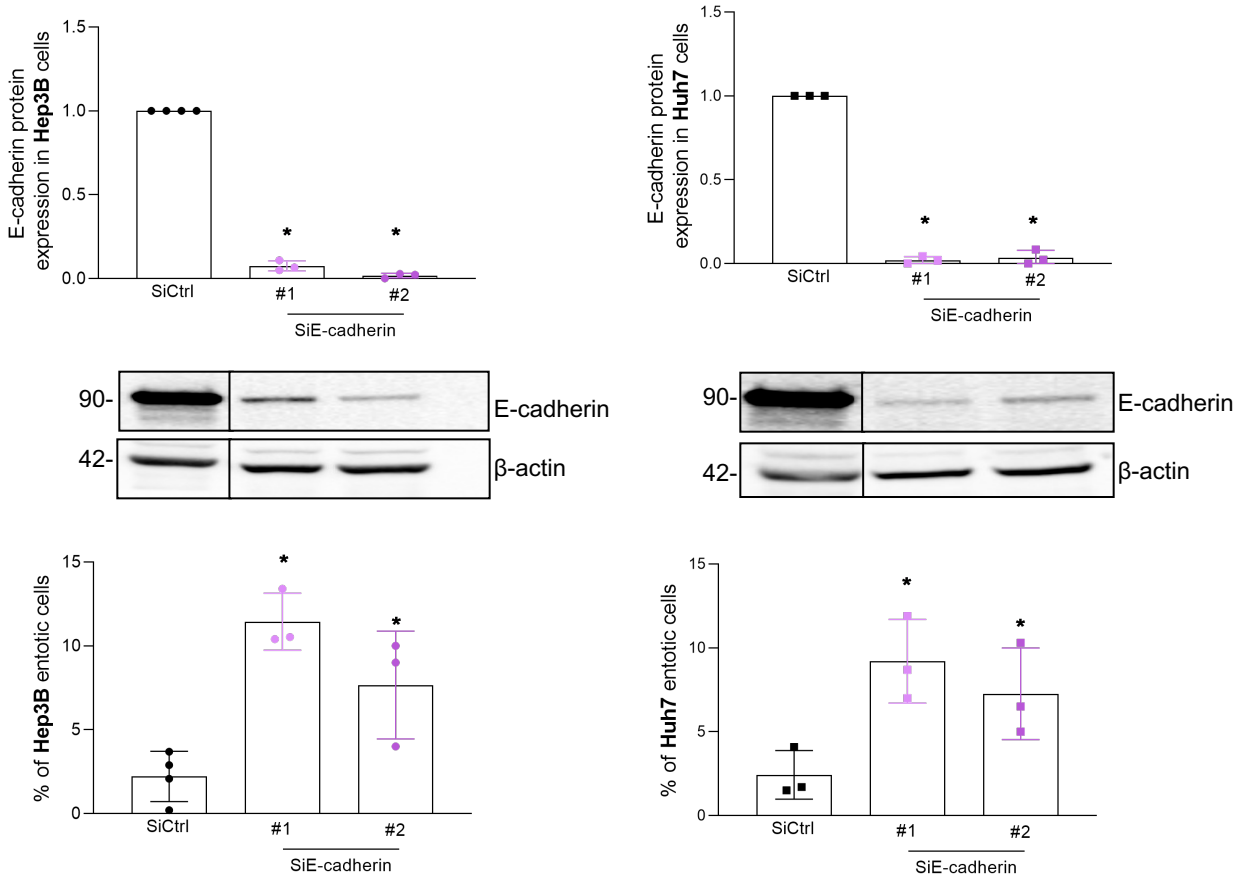

# Supplemental Figure 7

A

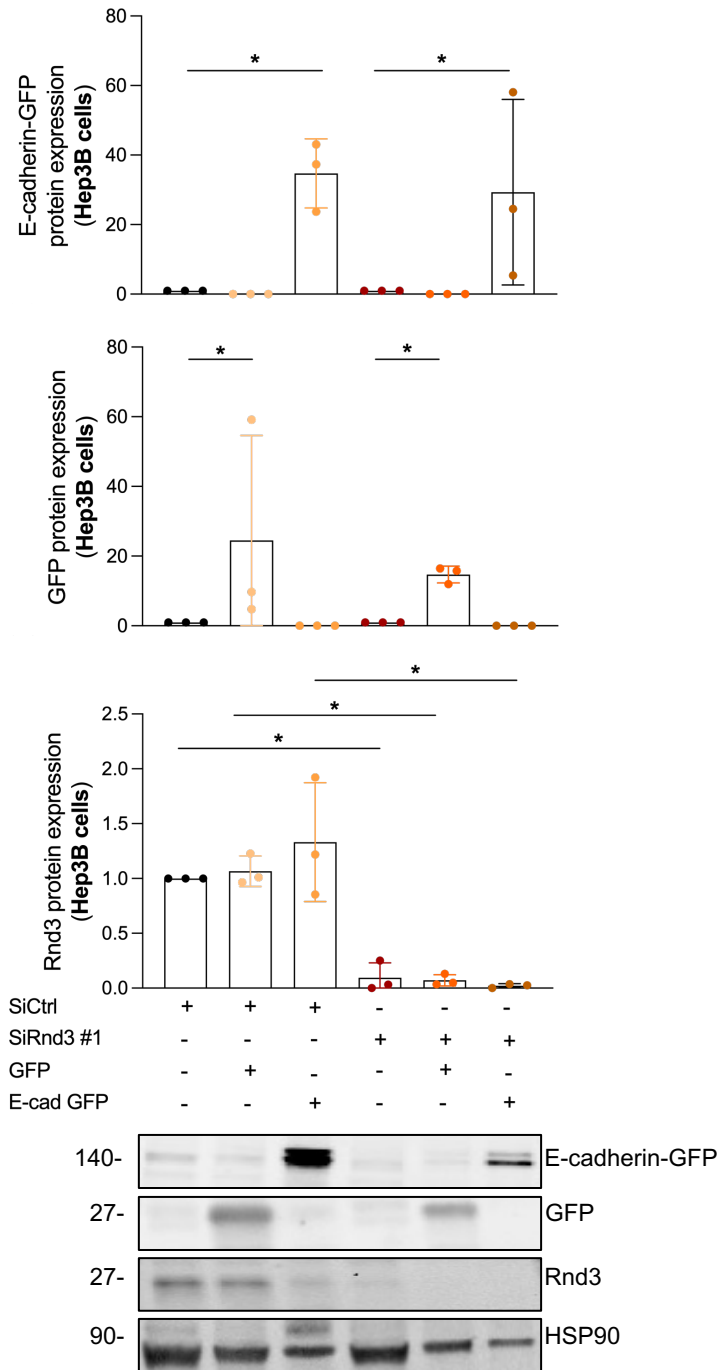

B

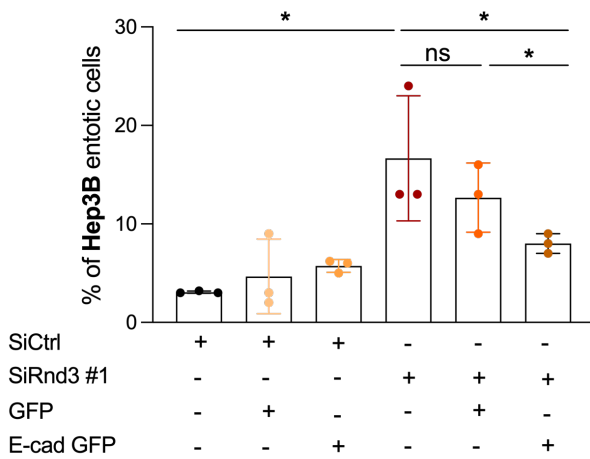

# Supplemental Figure 8

A

Path Designer LAMP1 env PATH DESIGN

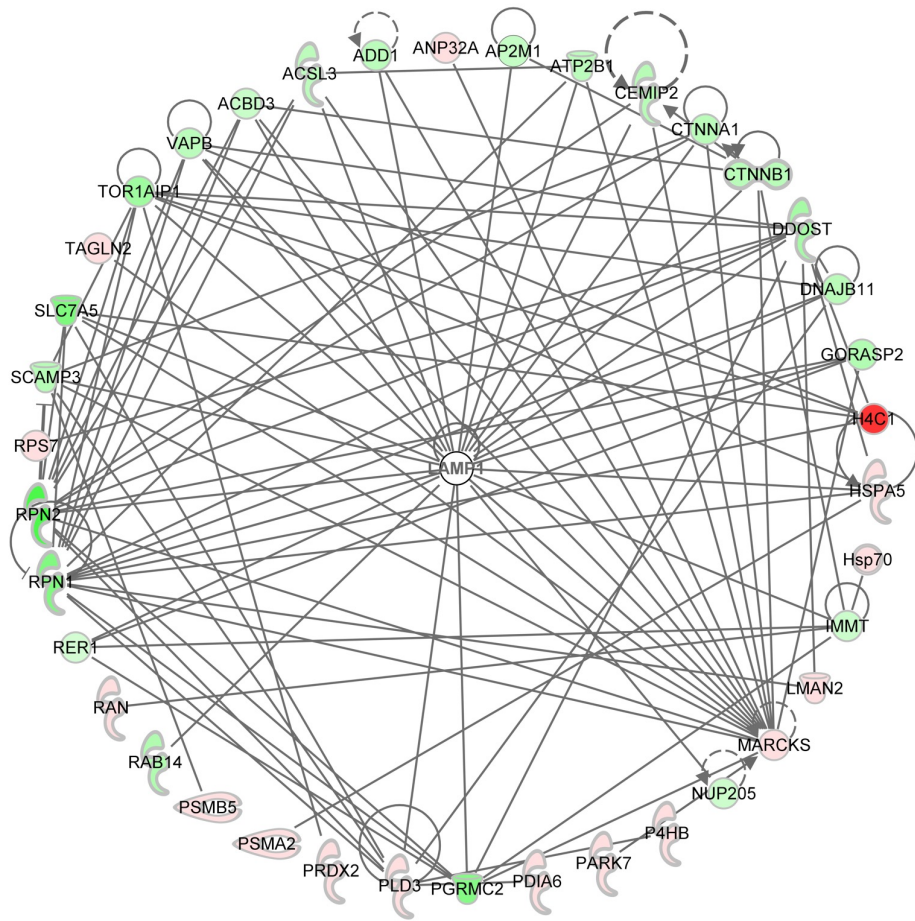

© 2000-2023 QIAGEN. All rights reserved.

B

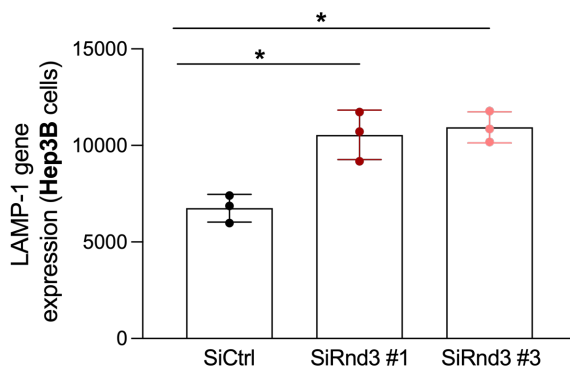

C

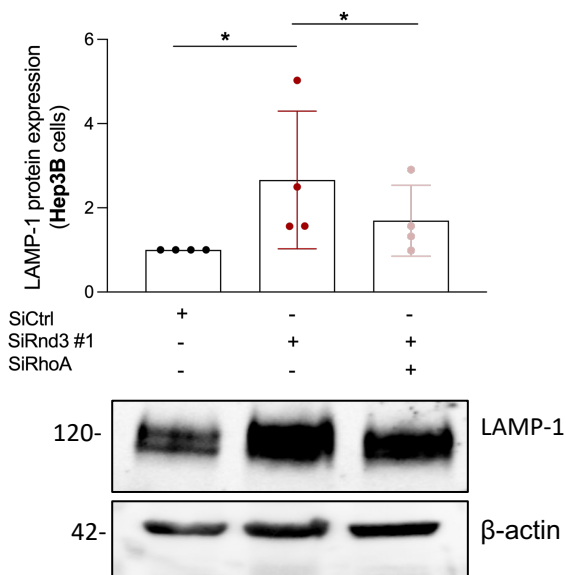

Supplement: 41419_2024_6420_MOESM1_ESM.pdf [file 41419_2024_6420_MOESM1_ESM.pdf]
