# Supplementary material for: Loss of RND3/RHOE controls entosis through LAMP1 expression in hepatocellular carcinoma
Source: PubMed Central journal article supplement (PMC10787830; doi:10.1038/s41419-024-06420-3), 2024-01-13

Page Ruler Plus Prestained Protein Ladder 10 to 250 kDa #26619  
Used for all western blot experiment

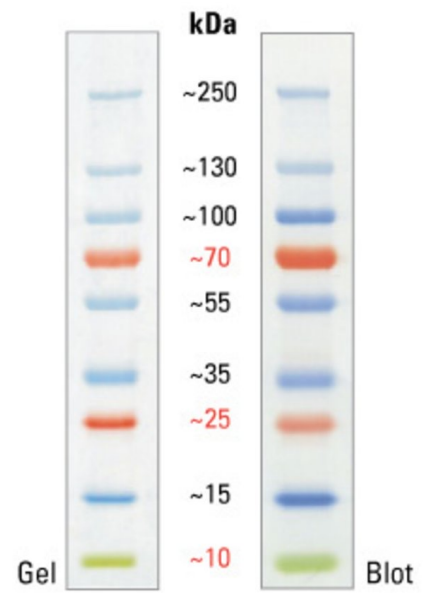

# Figure 2

A

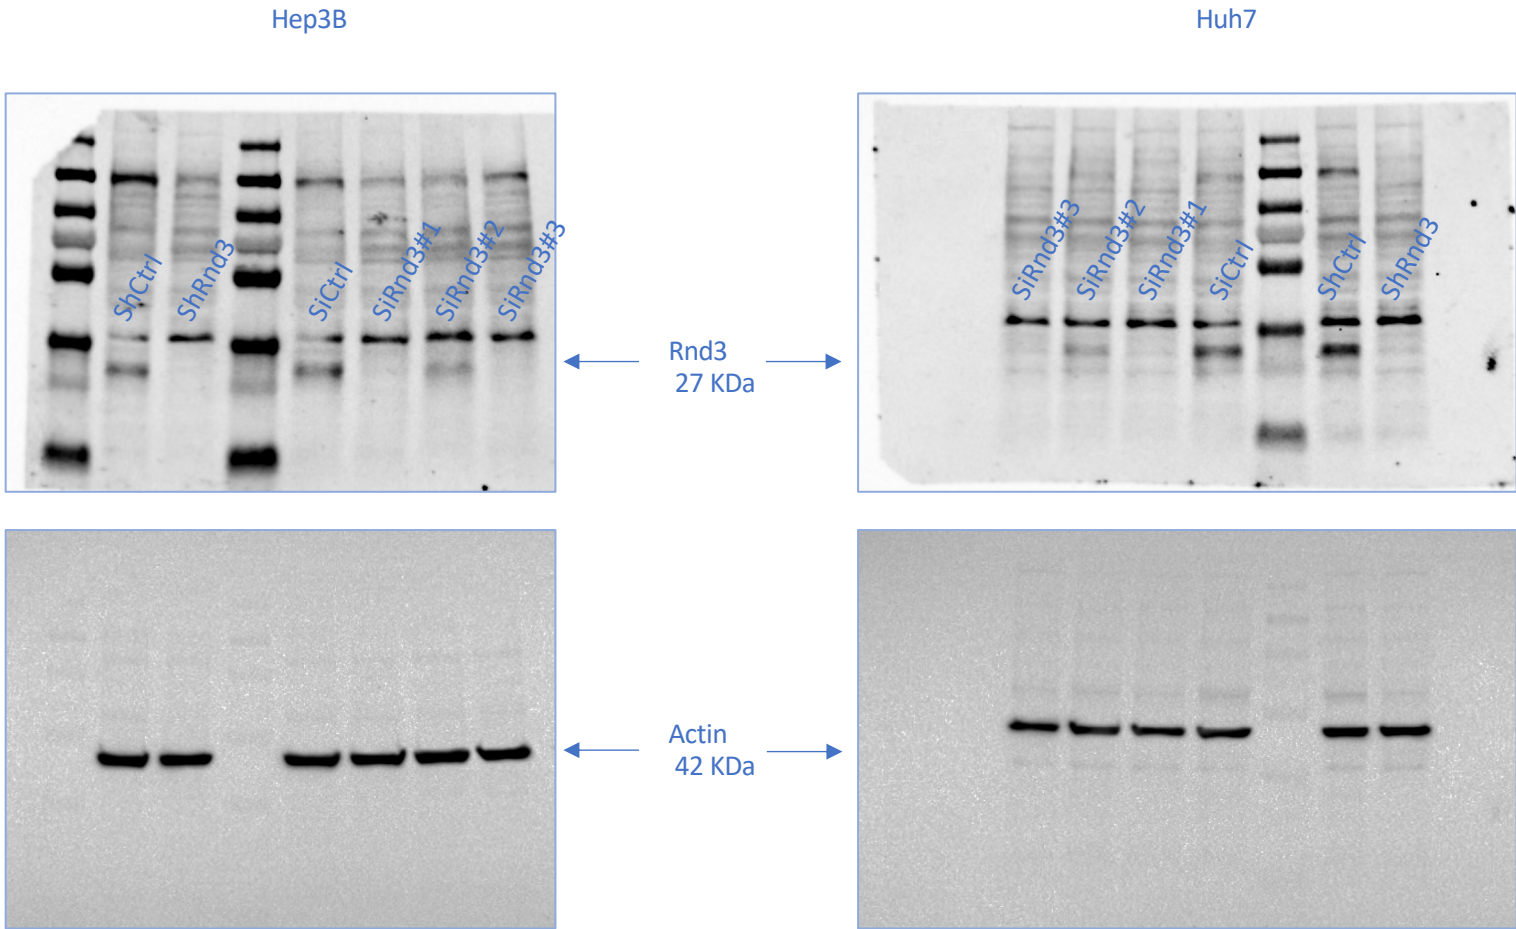

# Figure 4

B

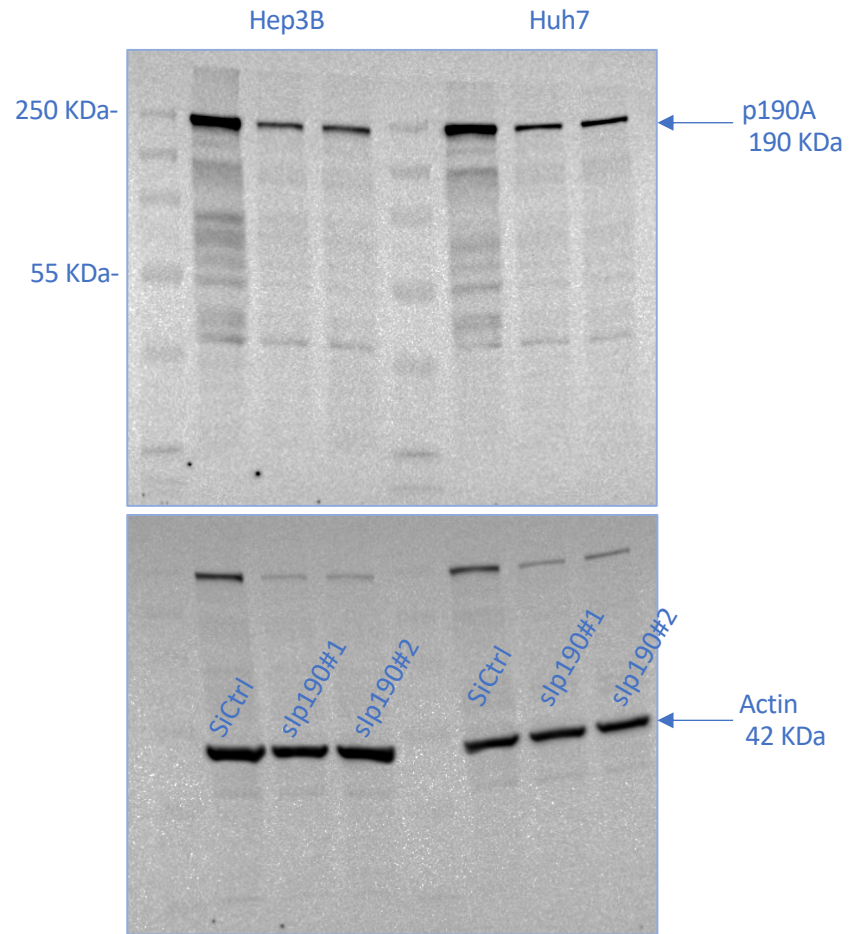

C

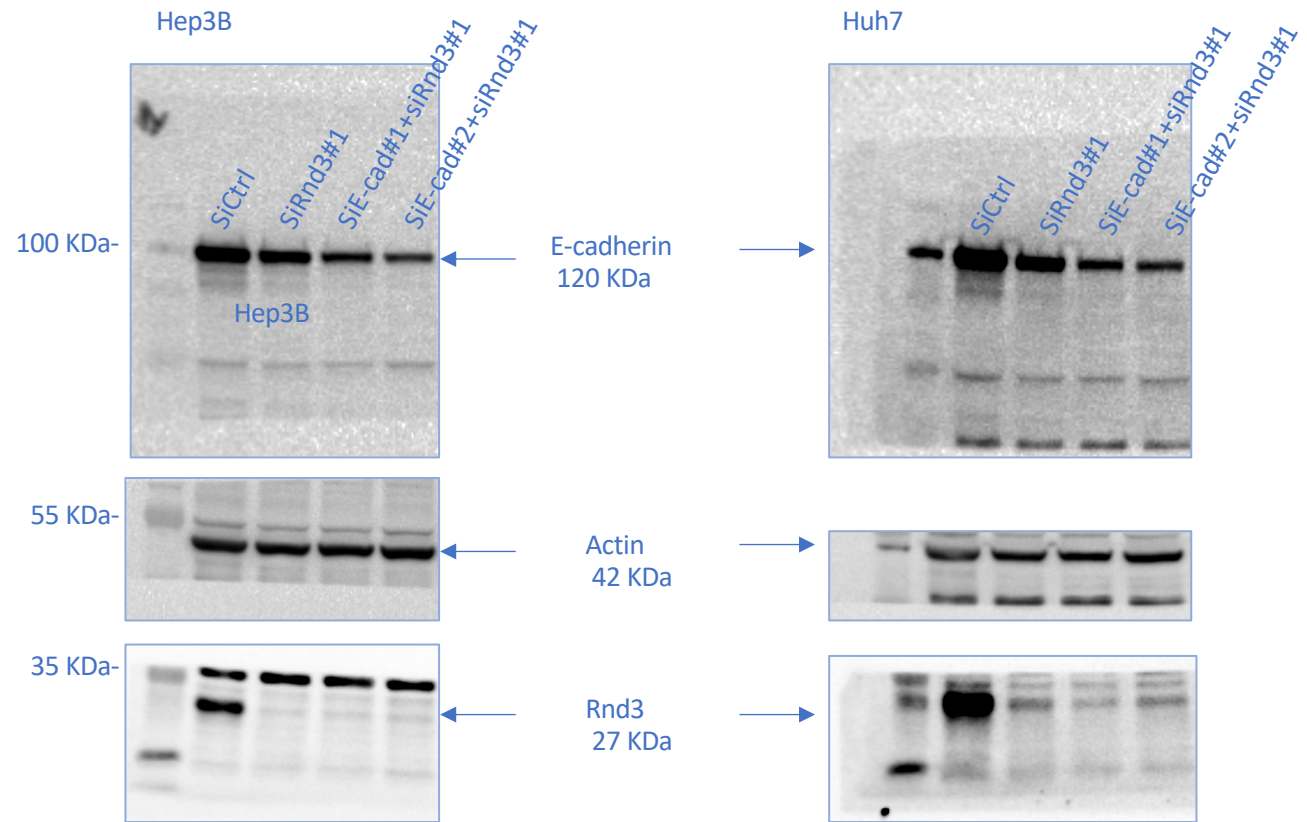

# Figure 5

C

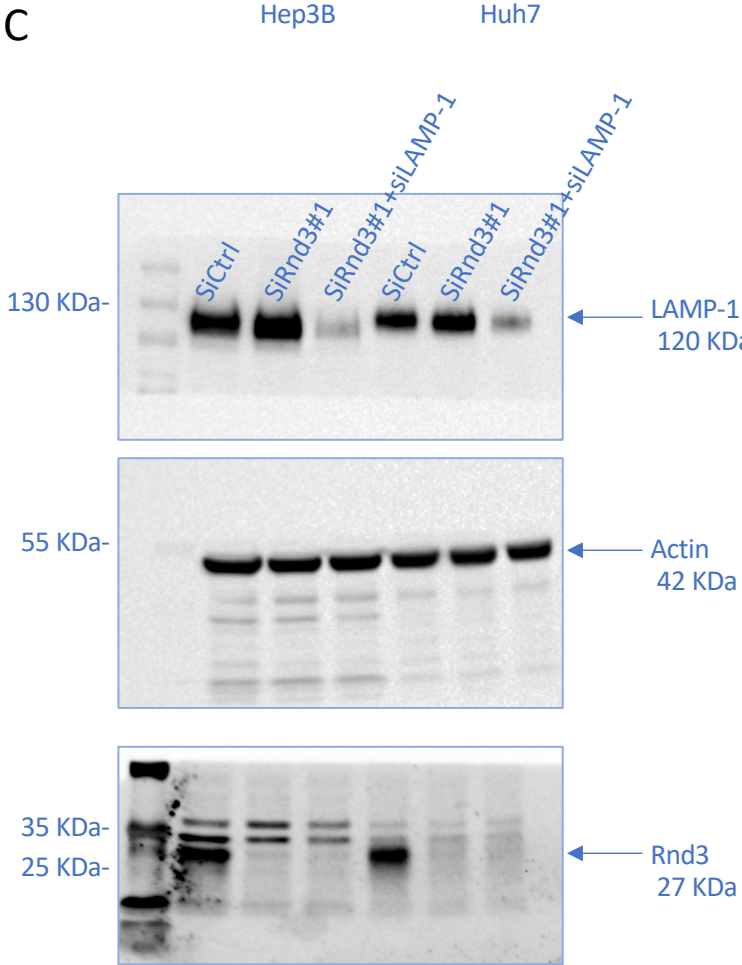



# Supplemental Figure 1

C

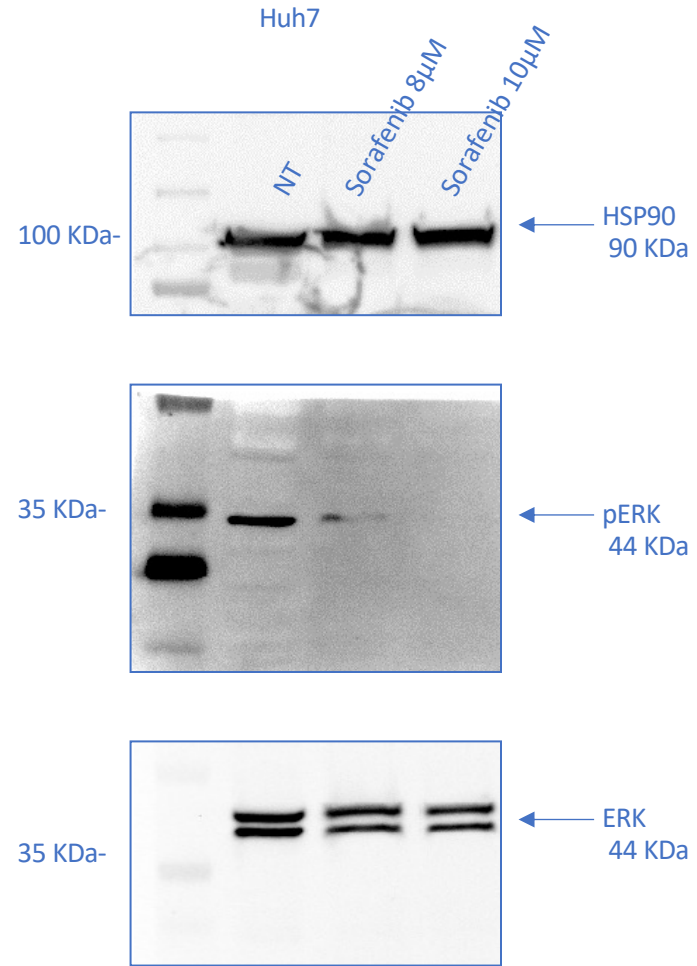

# Supplemental Figure 2

A

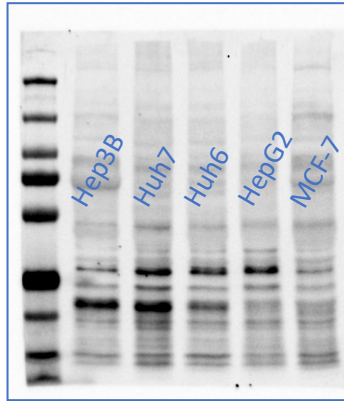

Rnd3  
27 KDa

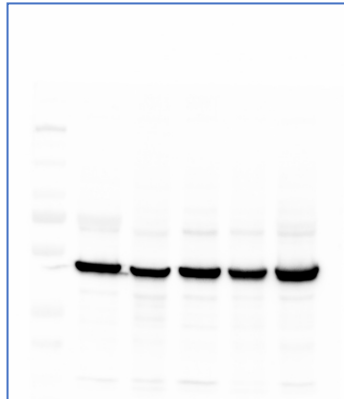

Actin  
42 KDa

B-C

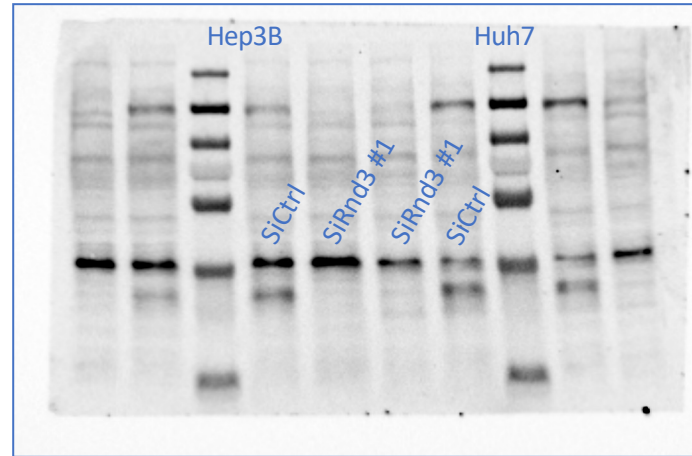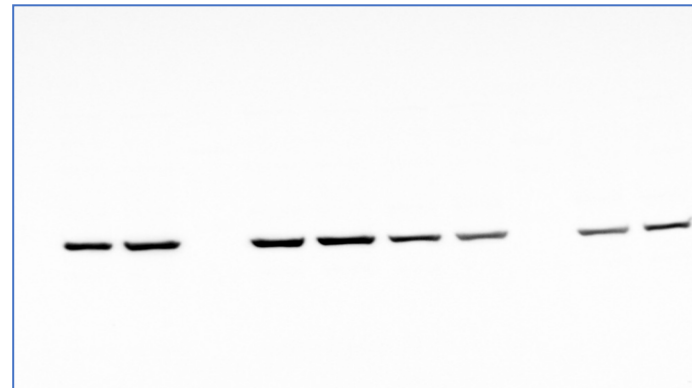

# Supplemental Figure 3

B

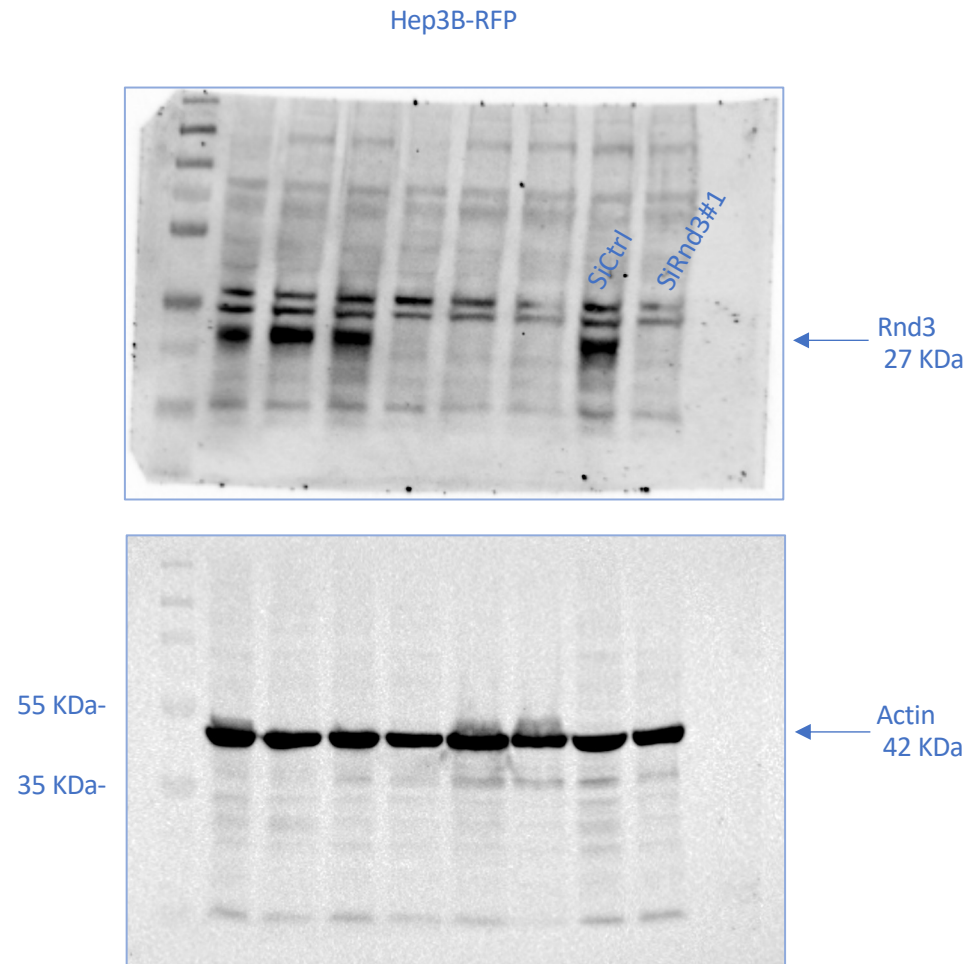

# Supplemental Figure 4

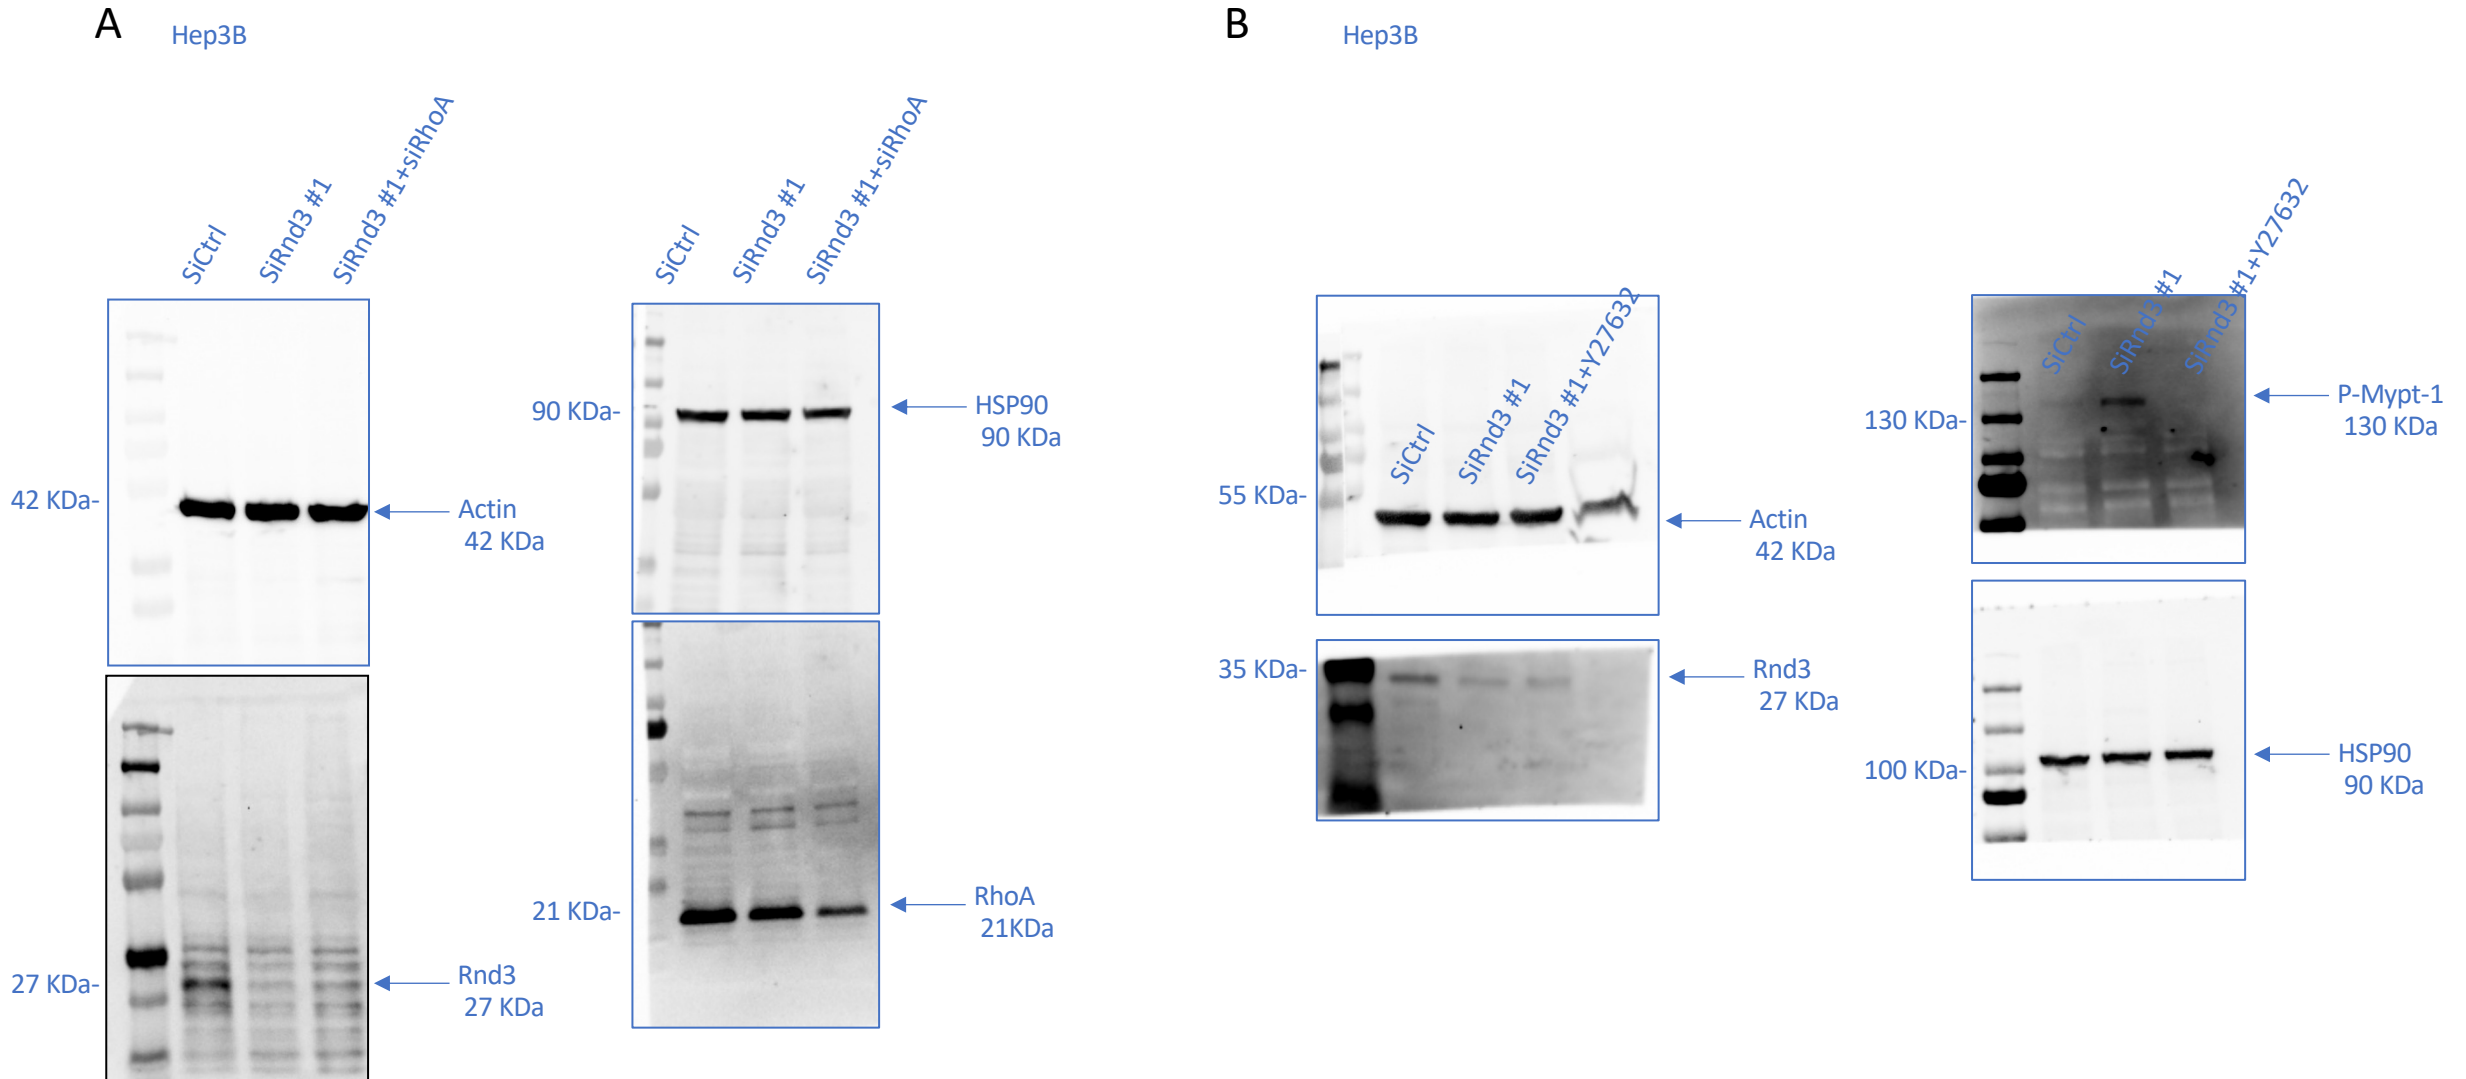

# Supplemental Figure 5

A

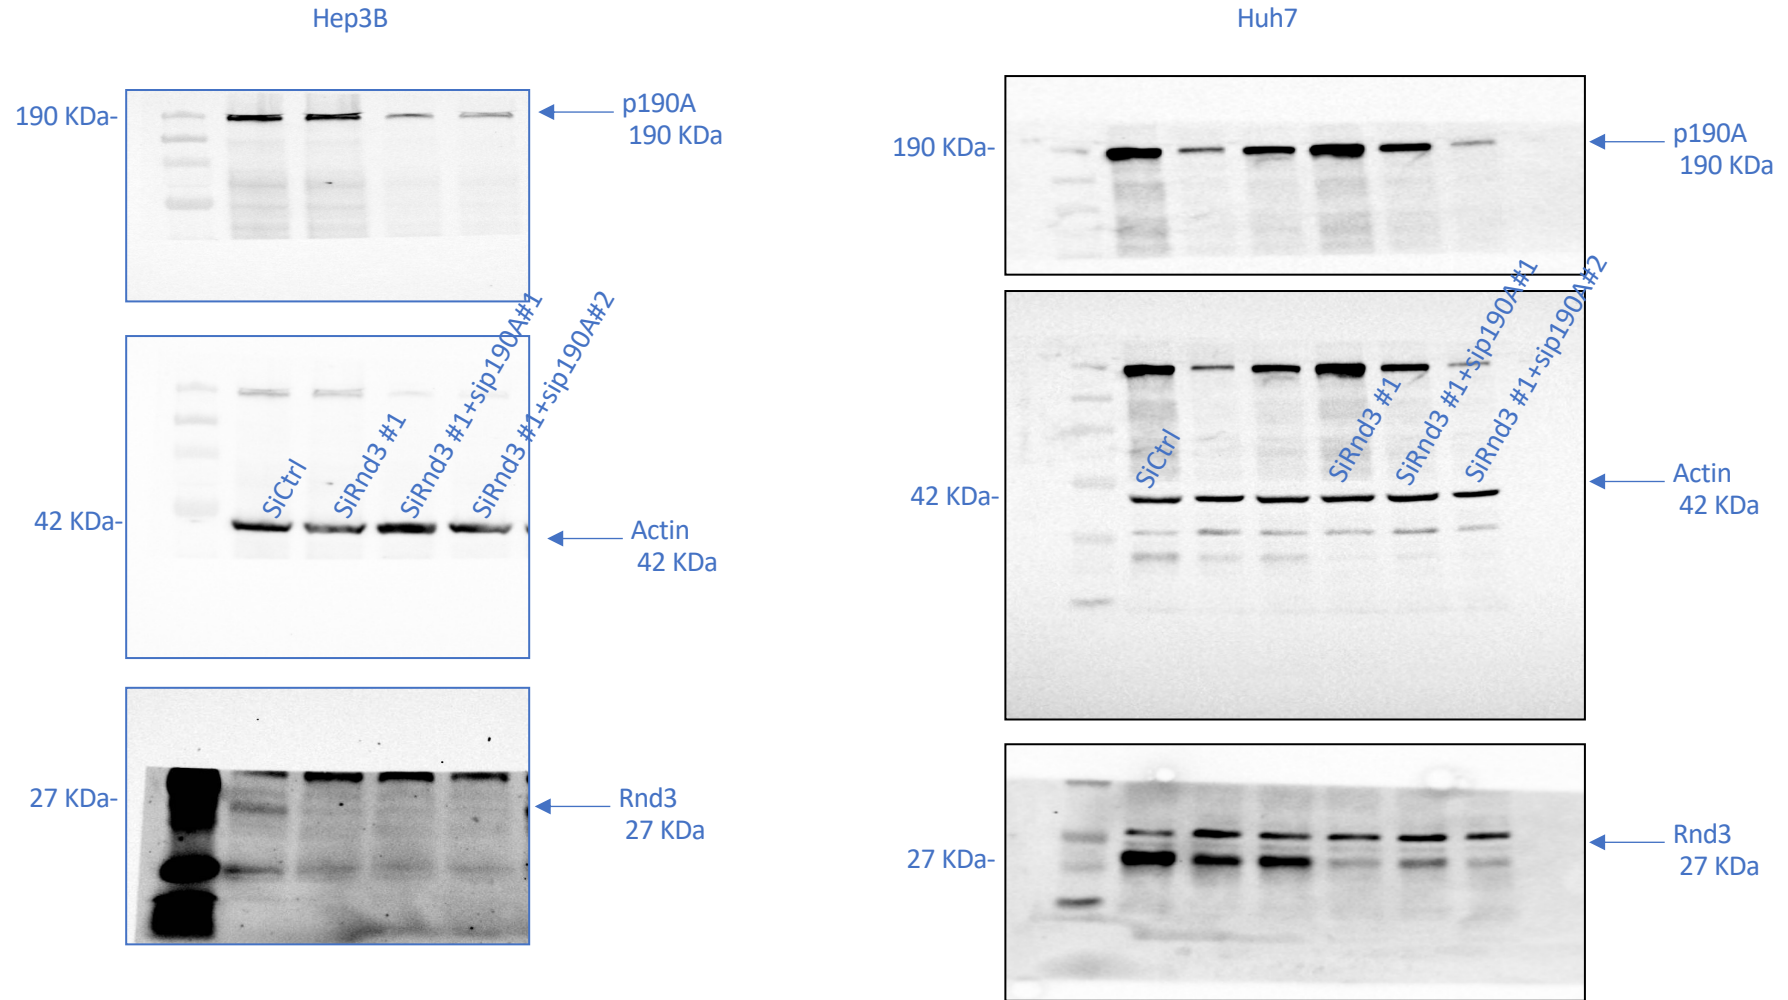

# Supplemental Figure 6

B

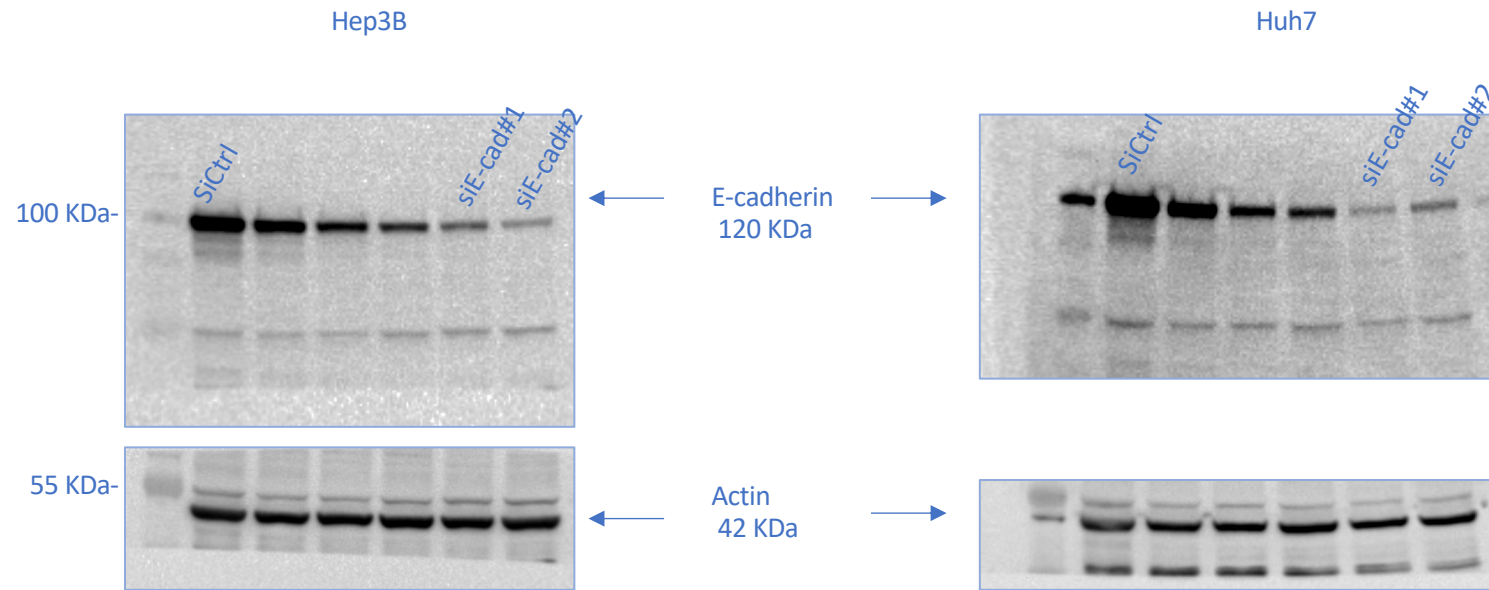

# Supplemental Figure 7

A

Hep3B

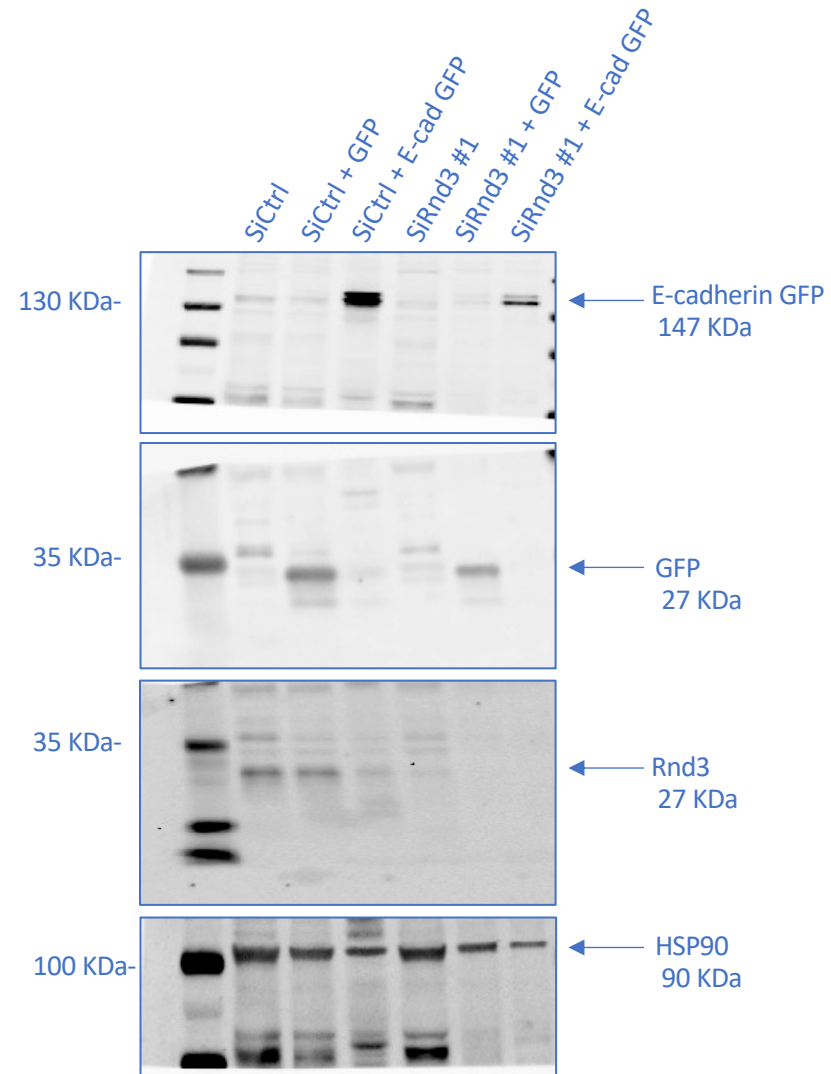



# Supplemental Figure 8

C

Hep3B

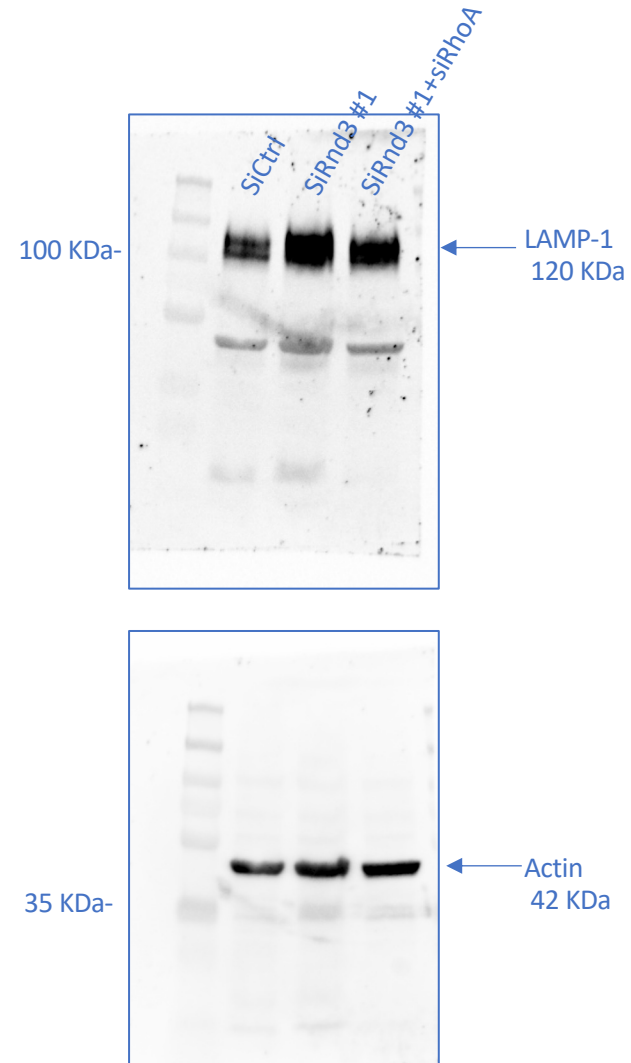

Supplement: 41419_2024_6420_MOESM9_ESM.pdf [file 41419_2024_6420_MOESM9_ESM.pdf]
